# Supplementary material for: Preclinical development of a Pfs230-Pfs48/45 chimeric malaria transmission-blocking vaccine
Source: PubMed Central journal article supplement (PMC8511065; doi:10.1038/s41541-021-00383-8), 2021-10-12
Supplement: 41541_2021_383_MOESM1_ESM.pdf [file 41541_2021_383_MOESM1_ESM.pdf]

## Supplementary Material

Preclinical development of a *Plasmodium falciparum* Pfs230-Pfs48/45 chimeric transmission-blocking vaccine

Susheel K. Singh<sup>1,2</sup>, Jordan Plieskatt<sup>3</sup>, Bishwanath K. Chourasia<sup>1,2</sup>, Vandana Singh<sup>1,2</sup>, Karin Lövgren Bengtsson<sup>4</sup>, Jenny M. Reimer<sup>4</sup>, Renate C. van Daalen<sup>5</sup>, Karina Teelen<sup>5</sup>, Marga van de Vegte-Bolmer<sup>5</sup>, Geert-Jan van Gemert<sup>5</sup>, Matthijs M. Jore<sup>5,\*,#</sup>, and Michael Theisen<sup>1,2,\*,#</sup>



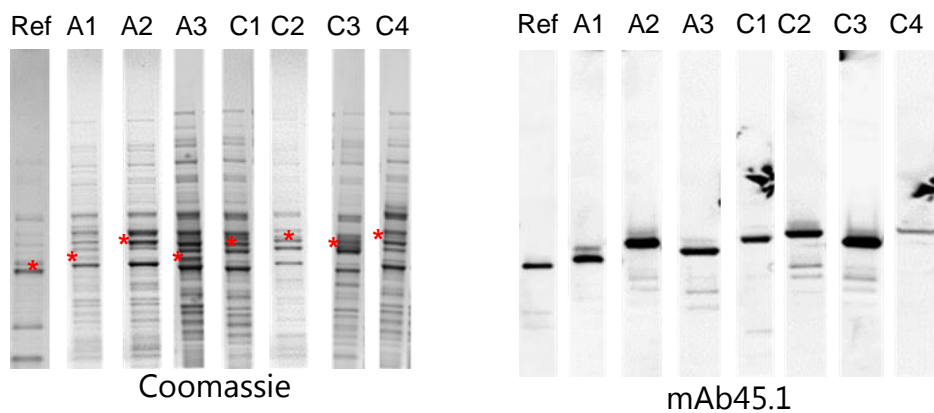

**Supplementary Figure S2. Screening for expression of Pro.6C linker constructs:** (Left Panel)

Coomassie blue-stained 4-12% polyacrylamide gel of supernatants from 5ml culture. Lane1 1: Pro-6C, Lane2: A1, Lane3: A2, Lane4: A3, Lane5: C1, Lane6: C2, Lane7: C3 and Lane8: C4;

(Right Panel) Immune blotting analysis of the same gel using the conformational reduction-sensitive mAb45.1 as primary antibody

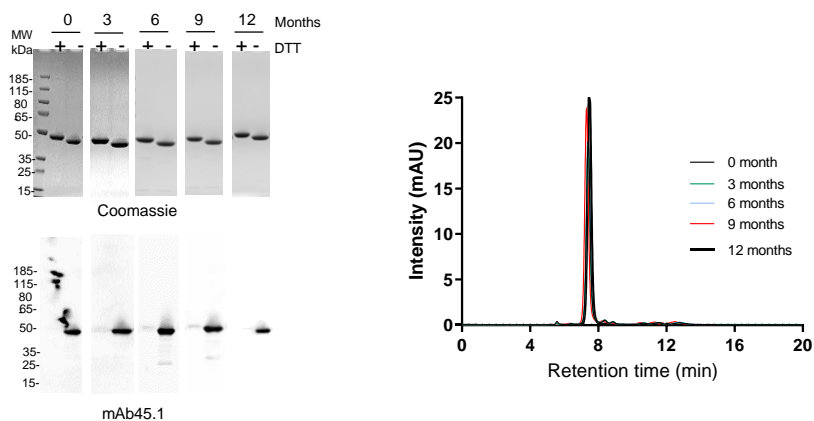

**Supplementary Figure S3. Long term stability at -80°C.** (Left Panel) Coomassie blue-stained 4–12.5% polyacrylamide gel; numeric Zero, 3, 6, 9 and 12 correspond to months (*upper panel*); an immune blot analysis of the same gel using mAb45.1 (*lower panel*). (Right Panel) SEC analysis (overlap chromatograms) of samples: Representative SEC chromatograms of ProC6C protein eluted contains the majority of the monomer.

Gel 1:

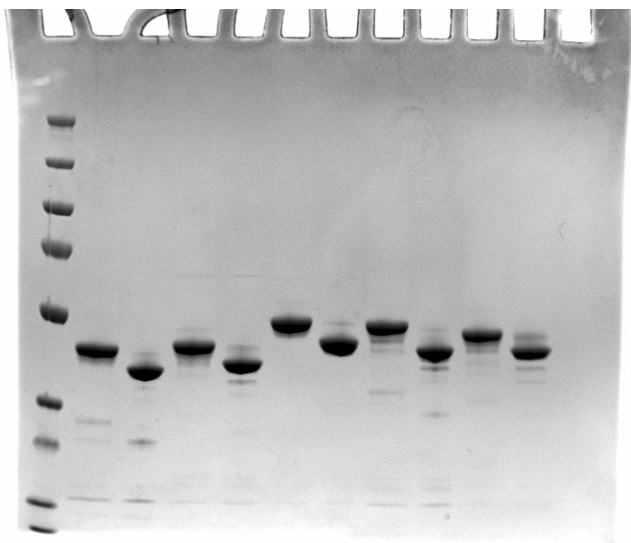

Gel 2:

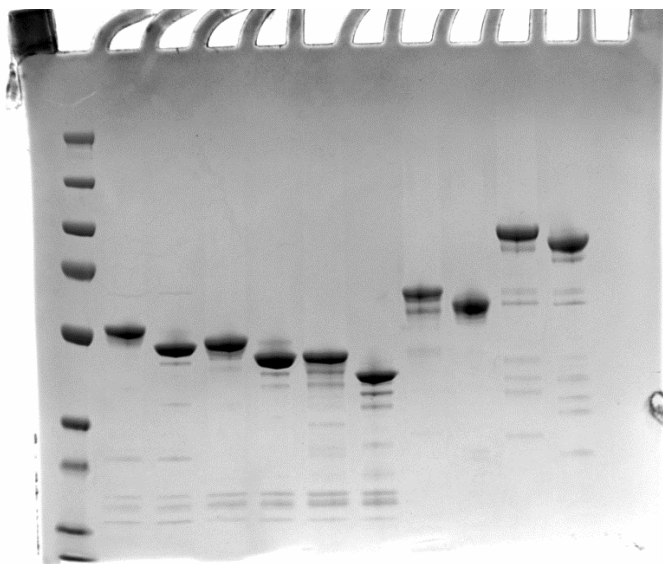

**Supplementary Figure S4. Raw original image files for Figure 1b (SDS-PAGE)**

Blot 1:

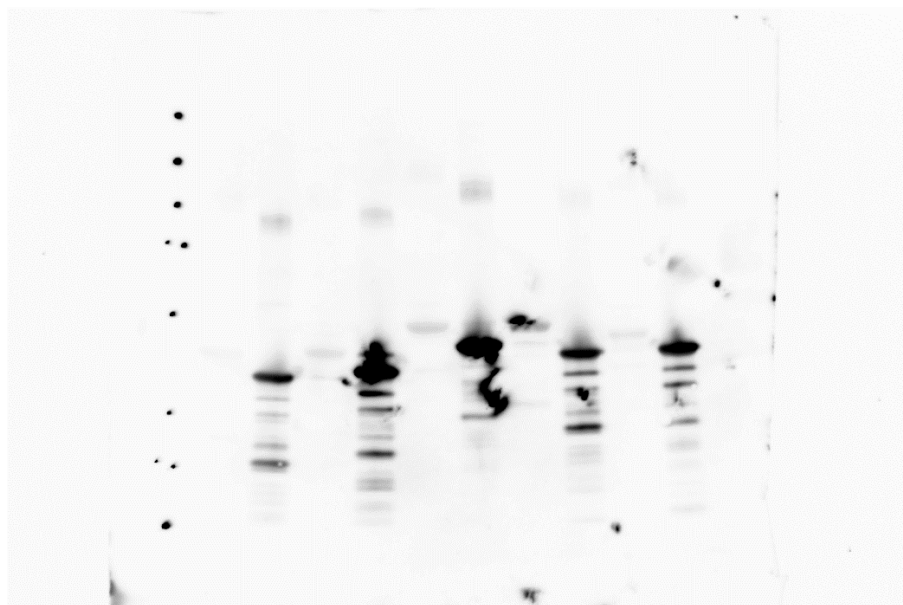

Blot 2:

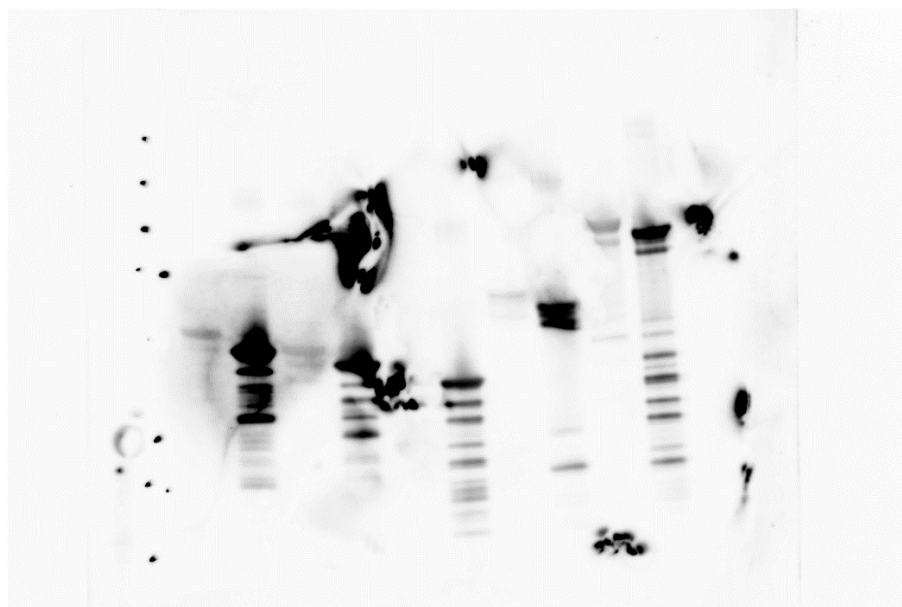

**Supplementary Figure S5. Raw original image files for Figure 1b (Western blots)**

Gel 1:

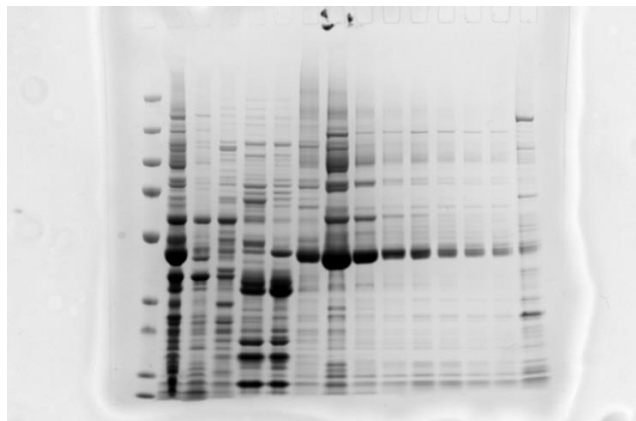

Gel 2:

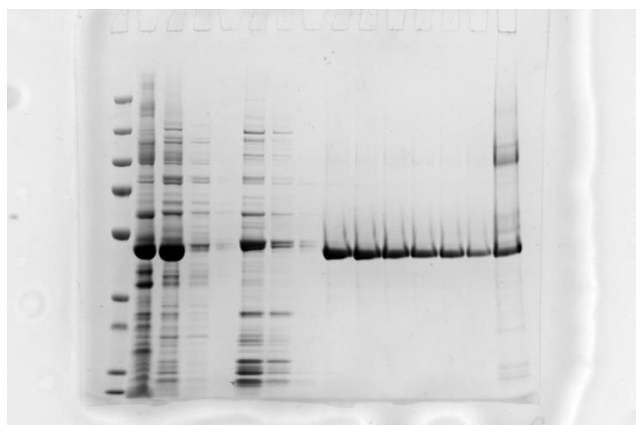

Gel 3:

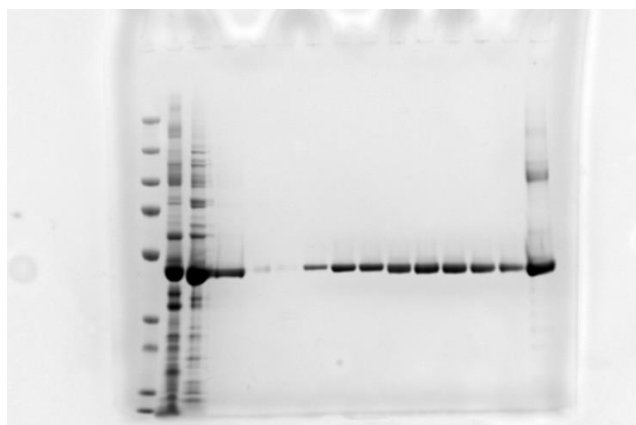

**Supplementary Figure S6. Raw original image files for Figure 3a (SDS-PAGE)**

Gel 1:

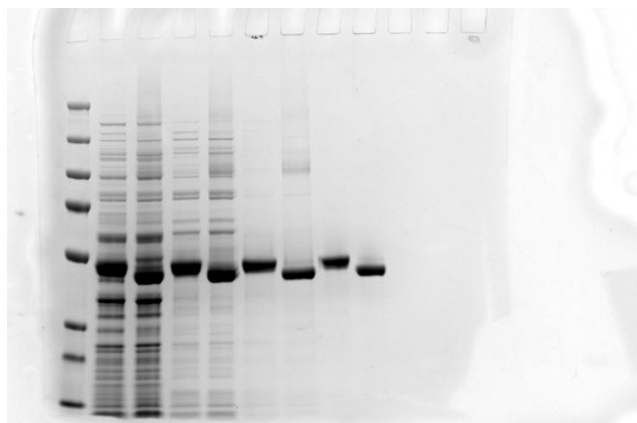

Blot 1:

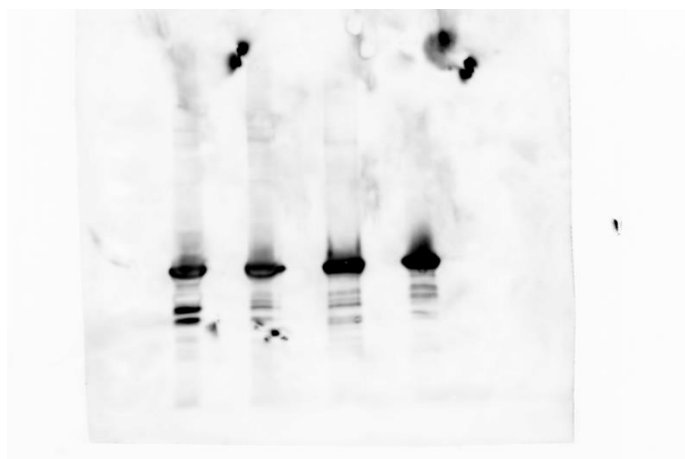

Blot 2:

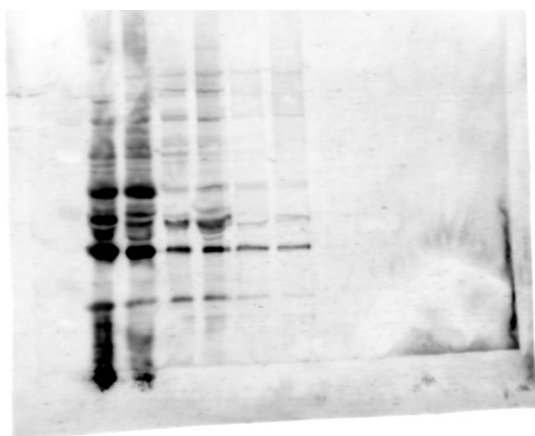

**Supplementary Figure S7. Raw original image files for Figure 3b (SDS-PAGE and Western blot)**



## Supplementary Tables:

**Supplementary Table S1. Column parameters for the purification of ProC6C**

| IEC Q HP Capturing                                                                   | 1 L                                |  | 5 L                                |  |
|--------------------------------------------------------------------------------------|------------------------------------|--|------------------------------------|--|
| Resin                                                                                | HiPrep Q HP (GE Healthcare)        |  | HiPrep Q HP (GE Healthcare)        |  |
| Dimensions                                                                           | Prepacked 16/10                    |  | XK-26                              |  |
| Flow rate                                                                            | 5 ml/min                           |  | 5 ml/min                           |  |
| Column Volume                                                                        | 20ml                               |  | 79.6ml                             |  |
| Column Pressure                                                                      | 0.5 Mpa                            |  | 0.6 Mpa                            |  |
| Buffer                                                                               | Steps                              |  | Steps                              |  |
| A: 20mM HEPES, 5% Glucose,<br>50mM Sod. Borate, 10mM L-<br>arginine, 1mM EDTA, pH6.5 | Load: 0%                           |  | Load: 0%                           |  |
|                                                                                      | Wash: A+50mM NaCl                  |  | Wash: A+50mM NaCl                  |  |
|                                                                                      | Wash: A+100mM NaCl                 |  | Wash: A+100mM NaCl                 |  |
|                                                                                      | Elution: A+200mM NaCl              |  | Elution: A+200mM NaCl              |  |
|                                                                                      | Strip: A+1M NaCl                   |  | Strip: A+1M NaCl                   |  |
| Load volume                                                                          | 0.2L                               |  | 1.5L                               |  |
| Load conductivity                                                                    | 8.23 mS/cm                         |  | 8.58 mS/cm                         |  |
| Load pH                                                                              | 6.5                                |  | 6.5                                |  |
| Eluate Volume                                                                        | 115 ml                             |  | 320 ml                             |  |
| Eluate Conductivity                                                                  | 21.12 mS/cm                        |  | 21.5 mS/cm                         |  |
| Eluate Peak Height                                                                   | 3000 mAU                           |  | 3000 mAU                           |  |
| Eluate Peak Area                                                                     | 36674                              |  | 98058                              |  |
| Capture Select HCP removal                                                           | 1 L                                |  | 5 L                                |  |
| Resin                                                                                | Capture selectXL (GE Healthcare)   |  | XK-26                              |  |
| Dimensions                                                                           | Prepacked 5ml (5mlx3Columns)       |  | XK-26                              |  |
| Flow rate                                                                            | 2.5ml/min                          |  | 2.5ml/min                          |  |
| Column Volume                                                                        | 15ml                               |  | 79.6ml                             |  |
| Column Pressure                                                                      | 0.3 Mpa                            |  | 0.6 Mpa                            |  |
| Buffer                                                                               | Steps                              |  | Steps                              |  |
| B: 20mM HEPES, 5% Glucose,<br>5mM L-arginine, 1mM EDTA,<br>pH7.0                     | Load: 0%                           |  | Load: 0%                           |  |
|                                                                                      | Wash: B                            |  | Wash: B                            |  |
|                                                                                      | Wash: B+140mM MgCl <sub>2</sub>    |  | Wash: B+140mM MgCl <sub>2</sub>    |  |
|                                                                                      | Elution: B+700mM MgCl <sub>2</sub> |  | Elution: B+700mM MgCl <sub>2</sub> |  |
|                                                                                      | Strip: B+2M MgCl <sub>2</sub>      |  | Strip: B+2M MgCl <sub>2</sub>      |  |
| Load volume                                                                          | 920 ml                             |  | 2560 ml                            |  |
| Load conductivity                                                                    | 5.02mS/cm                          |  | 5.12 mS/cm                         |  |
| Load pH                                                                              | 7.0                                |  | 7.0                                |  |
| Eluate Volume                                                                        | 125 ml                             |  | 360 ml                             |  |
| Eluate Conductivity                                                                  | 75.95 mS/cm                        |  | 75.25 mS/cm                        |  |
| Eluate Peak Height                                                                   | 890 mAU                            |  | 1530 mAU                           |  |
| Eluate Peak Area                                                                     | 8034.2                             |  | 14559                              |  |
| IEC Q HP Polishing                                                                   | 1 L                                |  | 5 L                                |  |
| Resin                                                                                | HiPrep Q HP (GE Healthcare)        |  | HiPrep Q HP (GE Healthcare)        |  |
| Dimensions                                                                           | Prepacked 16/10                    |  | XK-26                              |  |
| Flow rate                                                                            | 4ml/min                            |  | 4ml/min                            |  |
| Column Volume                                                                        | 20ml                               |  | 79.6ml                             |  |
| Column Pressure                                                                      | 0.5 Mpa                            |  | 0.6 Mpa                            |  |
| Buffer                                                                               | Steps                              |  | Steps                              |  |

C: 20mM HEPES, 5% Glucose,  
1mM EDTA, pH8.0

Load: 0%  
Wash: C+150mM NaCl Wash:  
C+270mM NaCl  
Elution: C+310mM NaCl  
Strip: C+1M NaCl

Load: 0%  
Wash: C+150mM NaCl  
Wash: C+270mM NaCl  
Elution: C+310mM NaCl  
Strip: C+1M NaCl

Load volume  
Load conductivity  
Load pH  
Elutae Volume  
Eluate Conductivity  
Eluate Peak Height  
Eluate Peak Area

1000 ml  
9.18 mS/cm  
8.0  
50ml  
71.7 mS/cm  
190 mAU  
1555

2880 ml  
9.20 mS/cm  
8.0  
190 ml  
71.23 mS/cm  
570 mAU  
1870
